# Supplementary material
Source: MDPI journal article supplement (https://www.mdpi.com/2075-5309/14/5/1227)
Supplement: s1 [file s1]

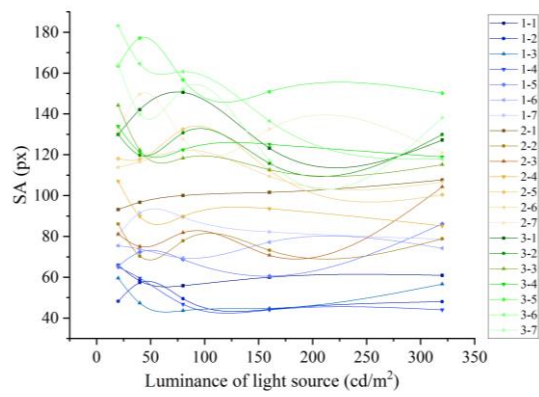

a) viewing distance = 1.5 m

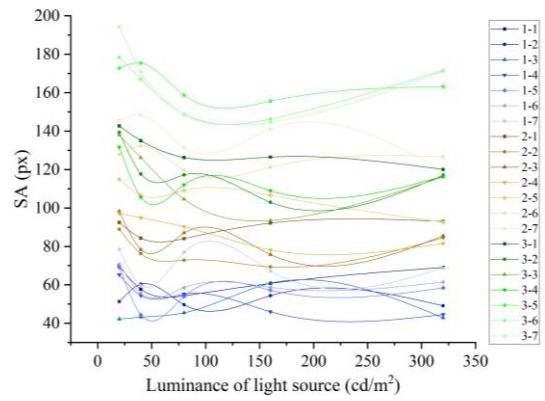

b) viewing distance = 3.0 m

Figure S1. Relation between light source form and SA

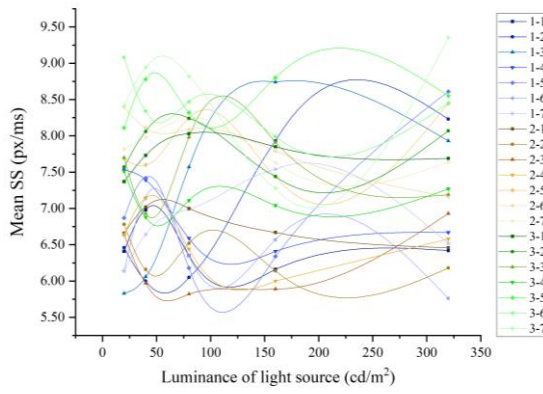

a) viewing distance = 1.5 m

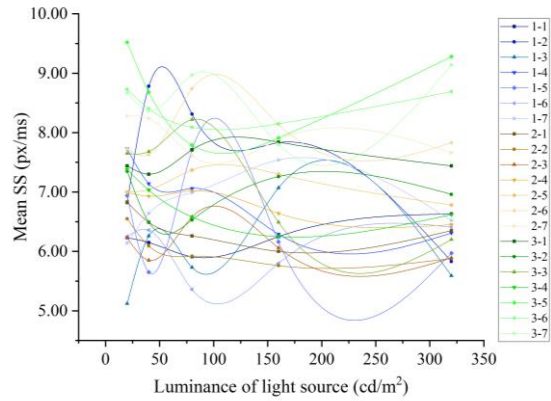

b) viewing distance = 3.0 m

Figure S2. Relation between light source form and Mean SS

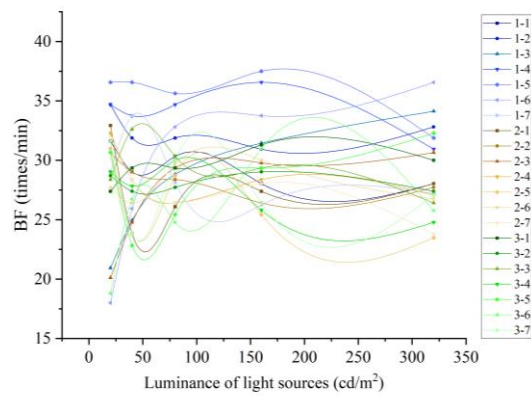

a) viewing distance = 1.5 m

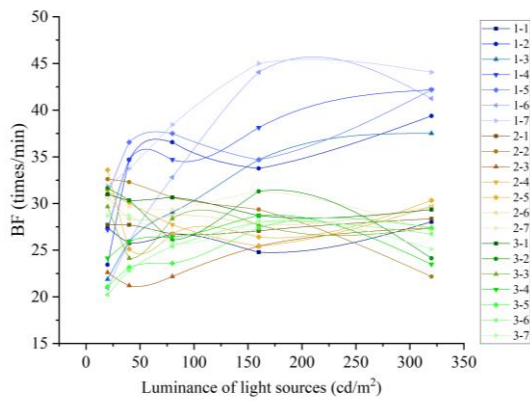

b) viewing distance = 3.0 m

Figure S3. Relation between light source form and BF

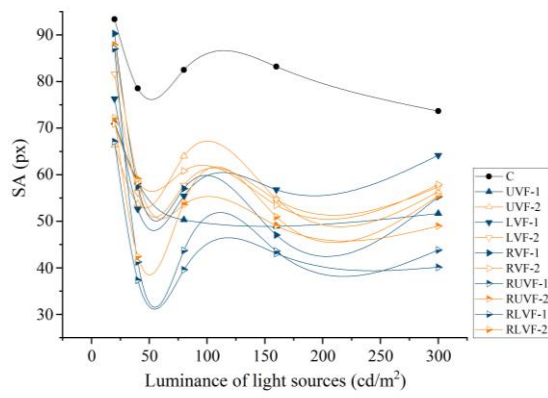

a) viewing distance = 1.5 m

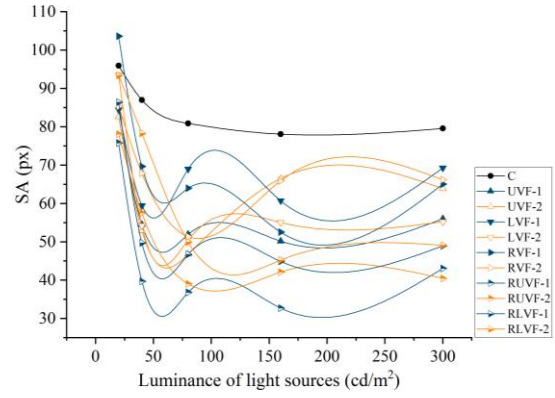

b) viewing distance = 3.0 m

Figure S4. Relation between light source position and SA

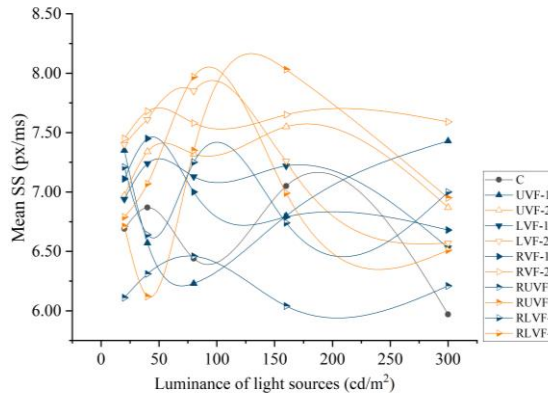

a) viewing distance = 1.5 m

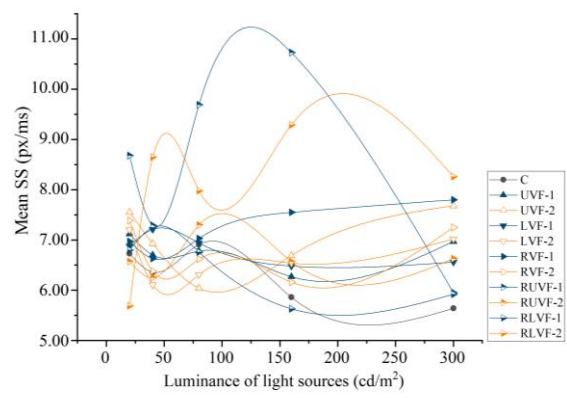

b) viewing distance = 3.0 m

Figure S5. Relation between light source position and Mean SS

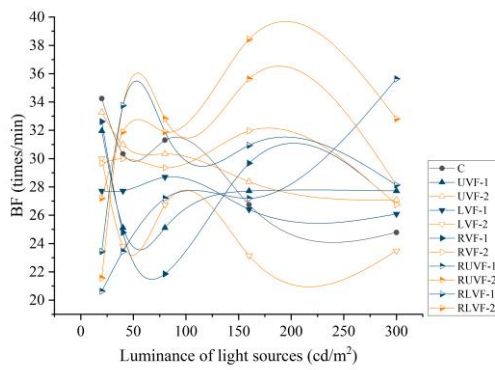

a) viewing distance = 1.5 m

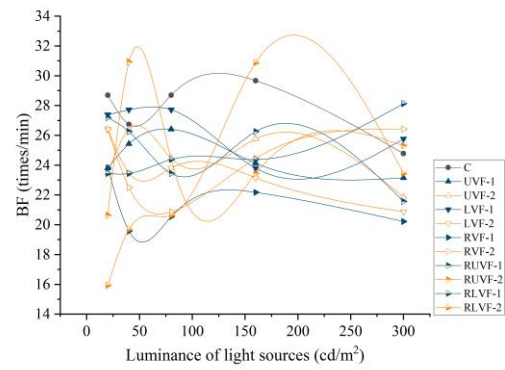

b) viewing distance = 3.0 m

Figure S6. Relation between light source position and BF
